# Supplementary material for: Electrolyte Intake and Major Food Sources of Sodium, Potassium, Calcium and Magnesium among a Population in Western Austria
Source: PubMed Central journal article supplement (PMC7400604; doi:10.3390/nu12071956), 2020-06-30
Supplement: nutrients-12-01956-s001.pdf [file nutrients-12-01956-s001.pdf]

**Supplementary Material**

**Table S1.** Electrolyte intake in association with gender, age groups and dietary patterns. Data shown as mean values and standard deviation in parentheses in mg/day.

|                         | <b>Sodium</b>   | <b>P-<br/>Value<sup>1</sup></b> | <b>Potassium</b> | <b>P-<br/>Value</b> | <b>Calcium</b>  | <b>P-<br/>Value</b> | <b>Magnesium</b> | <b>P-<br/>Value</b> |
|-------------------------|-----------------|---------------------------------|------------------|---------------------|-----------------|---------------------|------------------|---------------------|
| <i>women</i>            | 2080.6 (821.7)  |                                 | 2713.7 (950.50)  |                     | 869.6 (323.1)   |                     | 318.1 (115.1)    |                     |
| <i>men</i>              | 2981.4 (1248.9) |                                 | 3161.9 (1243.6)  |                     | 10945.0 (462.7) |                     | 389.5 (115.1)    |                     |
|                         |                 | <0.000                          |                  | <0.000              |                 | <0.000              |                  | <0.000              |
| <i>age groups</i>       |                 |                                 |                  |                     |                 |                     |                  |                     |
| 18 - 24 years           | 2697.7 (1252.9) |                                 | 3142.1 (1136.6)  |                     | 1119.9 (455.6)  |                     | 388.5 (150.2)    |                     |
| 25 - 50 years           | 2573.7 (1144.0) |                                 | 2960.1 (1189.3)  |                     | 987.1 (409.7)   |                     | 354.8 (137.6)    |                     |
| 51 - 64 years           | 2302.8 (1050.9) |                                 | 2747.4 (937.0)   |                     | 877.9 (366.3)   |                     | 327.8 (106.1)    |                     |
|                         |                 | 0.035                           |                  | 0.050               |                 | <0.000              |                  | 0.008               |
| <i>women</i>            |                 |                                 |                  |                     |                 |                     |                  |                     |
| 18 - 24 years           | 2102.3 (684.9)  |                                 | 2822.2 (924.7)   |                     | 963.7 (282.1)   |                     | 347.2 (125.4)    |                     |
| 25 - 50 years           | 2177.1 (902.6)  |                                 | 2666.7 (926.1)   |                     | 866.0 (282.1)   |                     | 311.1 (108.1)    |                     |
| 51 - 64 years           | 1853.2 (665.6)  |                                 | 2748.3 (1026.1)  |                     | 817.3 (300.4)   |                     | 315.2 (122.2)    |                     |
|                         |                 | 0.037                           |                  | 0.633               |                 | 0.085               |                  | 0.220               |
| <i>men</i>              |                 |                                 |                  |                     |                 |                     |                  |                     |
| 18 - 24 years           | 3342.7 (1409.6) |                                 | 3488.6 (1251.2)  |                     | 1289.1 (543.9)  |                     | 433.3 (163.2)    |                     |
| 25 - 50 years           | 2973.4 (1222.9) |                                 | 3255.7 (1345.5)  |                     | 1109.2 (438.2)  |                     | 398.7 (149.9)    |                     |
| 51 - 64 years           | 2775.7 (1173.0) |                                 | 2746.3 (842.1)   |                     | 941.6 (418.0)   |                     | 341.0 (84.9)     |                     |
|                         |                 | 0.100                           |                  | 0.007               |                 | 0.001               |                  | 0.004               |
| <i>Dietary patterns</i> |                 |                                 |                  |                     |                 |                     |                  |                     |
| Health conscious        | 1999.7 (993.6)  |                                 | 3176.6 (1438.2)  |                     | 911.2 (343.4)   |                     | 391.9 (171.4)    |                     |
| Traditional             | 2592.6 (1064.2) |                                 | 2685.8 (796.1)   |                     | 961.3 (405.6)   |                     | 320.9 (96.0)     |                     |
| Western                 | 3358.5 (1346.4) |                                 | 3834.4 (1369.0)  |                     | 1257.9 (499.0)  |                     | 453.1 (150.4)    |                     |
|                         |                 | <0.000                          |                  | <0.000              |                 | <0.000              |                  | <0.000              |

<sup>1</sup> P-Values for group differences are based on ANOVA for metric variables

**Table S2.** Percentage of persons with a discrepancy between reported intake and the recommended values for sodium, potassium, calcium and magnesium in different age groups.

| <b>Sodium (Na)</b>    |                                 |                                         |                                  |
|-----------------------|---------------------------------|-----------------------------------------|----------------------------------|
|                       | lower intake<br>(< 1350 mg/day) | adequate intake<br>(1350 - 1650 mg/day) | higher intake<br>(> 1650 mg/day) |
| 18-24 years, n=75     | 12.0 %                          | 5.3 %                                   | 82.7 %                           |
| 25-50 years, n=269    | 10.8 %                          | 6.3 %                                   | 82.9 %                           |
| 51-64 years, n=119    | 21.0 %                          | 3.4 %                                   | 75.6 %                           |
| <b>Potassium (K)</b>  |                                 |                                         |                                  |
|                       | lower intake<br>(< 3800 mg/day) | adequate intake<br>(3800 – 4200 mg/day) | higher intake<br>(> 4200 mg/day) |
| 18-24 years, n=75     | 74.7 %                          | 10.7 %                                  | 14.7 %                           |
| 25-50 years, n=269    | 84.4 %                          | 6.3 %                                   | 9.3 %                            |
| 51-64 years, n=119    | 89.9 %                          | 5.0 %                                   | 5.0 %                            |
| <b>Calcium (Ca)</b>   |                                 |                                         |                                  |
|                       | lower intake<br>(< 950 mg/day)  | adequate intake<br>(950 – 1050 mg/day)  | higher intake<br>(> 1050 mg/day) |
| 18-24 years, n=75     | 42.7 %                          | 10.7 %                                  | 46.7 %                           |
| 25-50 years, n=269    | 52.0 %                          | 6.7 %                                   | 41.3 %                           |
| 51-64 years, n=119    | 58.8 %                          | 14.3 %                                  | 26.9 %                           |
| <b>Magnesium (Mg)</b> |                                 |                                         |                                  |
|                       | lower intake<br>(< 285 mg/day)  | adequate intake<br>(285-420 mg/day)     | higher intake<br>(> 420 mg/day)  |
| 18-24 years, n=75     | 29.3 %                          | 40.0 %                                  | 30.7 %                           |
| 25-50 years, n=269    | 30.5 %                          | 45.4 %                                  | 24.2 %                           |
| 51-64 years, n=119    | 40.3 %                          | 44.5 %                                  | 15.1 %                           |
